# Supplementary material for: Framing of Poly(arylene-ethynylene) around Carbon Nanotubes and Iodine Doping for the Electrochemical Detection of Dopamine
Source: MDPI journal article supplement (doi:10.3390/bios13030308), 2023-02-22
Supplement: s1 [file s1]

# **Electronic Supplementary Information**

**for**

**Framing of poly(arylene-ethynylene) around carbon nanotubes and iodine doping for the electrochemical detection of dopamine**

Jose Paul, Md Moniruzzaman\*, and Jongsung Kim\*

*Department of Chemical and Biological Engineering, Gachon University, 1342 Seongnam-daero, Seongnam-si, Gyeonggi-do 13120, Republic of Korea*

## Section A. synthesis procedure and experimental plots

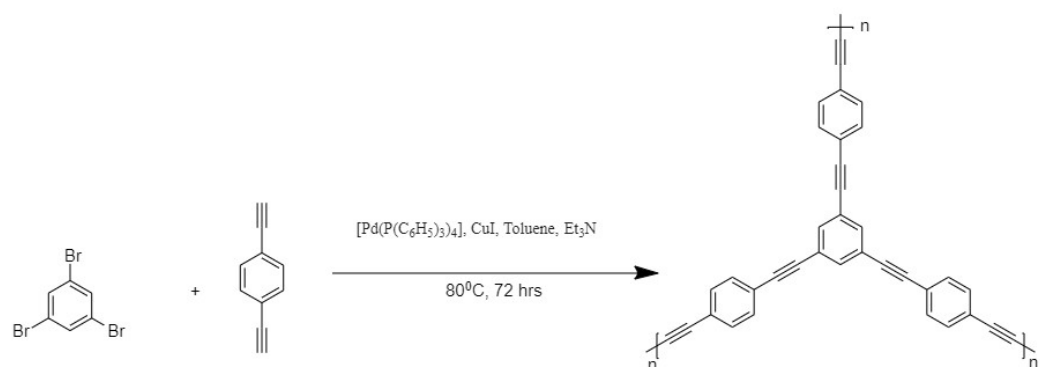

**Figure S1.** Reactants and synthesis method for CMP-4.

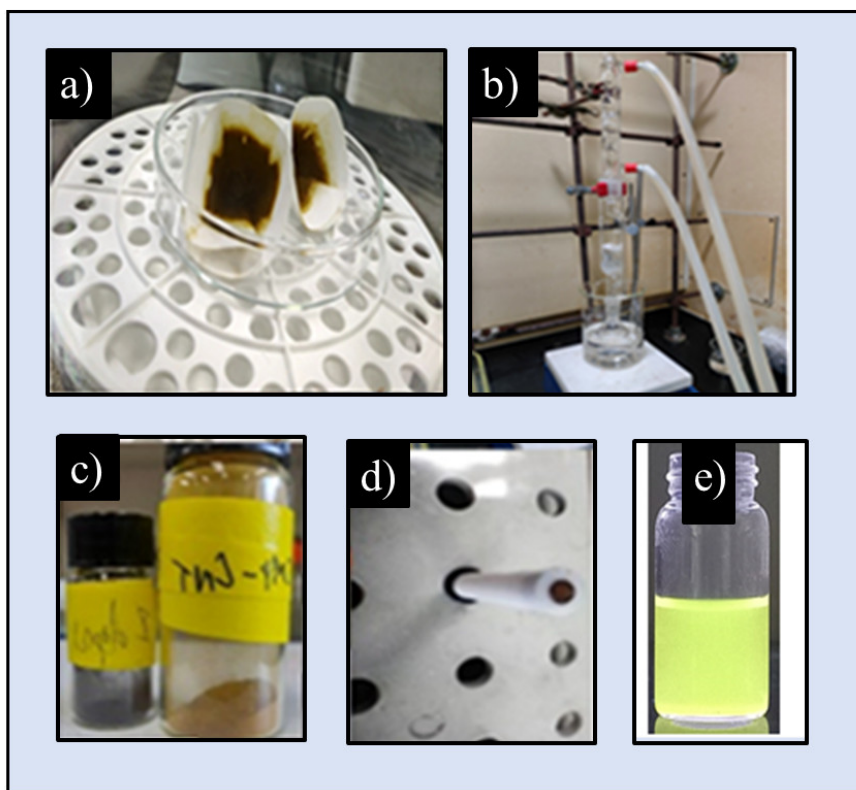

**Figure S2.** (a): Brown colored CMP-4, (b) Soxhlet method purification of CMP-CNT-4 in methanol, (c) Black colored I<sub>2</sub>-CMP-CNT-4 and brown colored CMP-CNT-4, (d) I<sub>2</sub>-CMP-CNT-4 modified GCE, (e) Fluorescence from CMP-4.

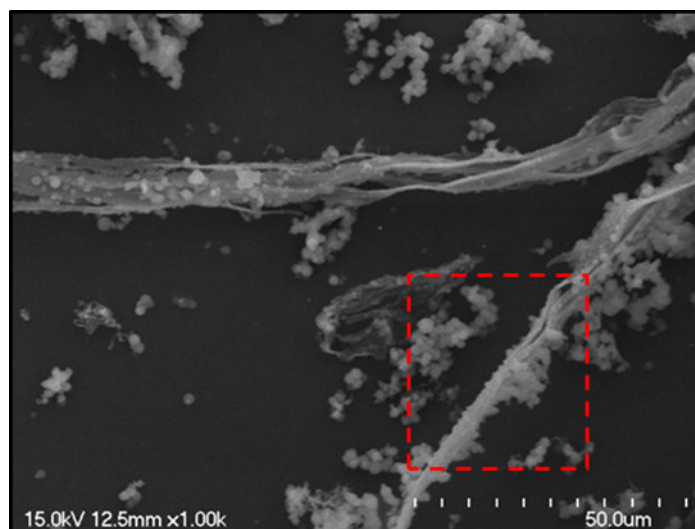

**Figure S3.** SEM image of CMP-CNT-4.

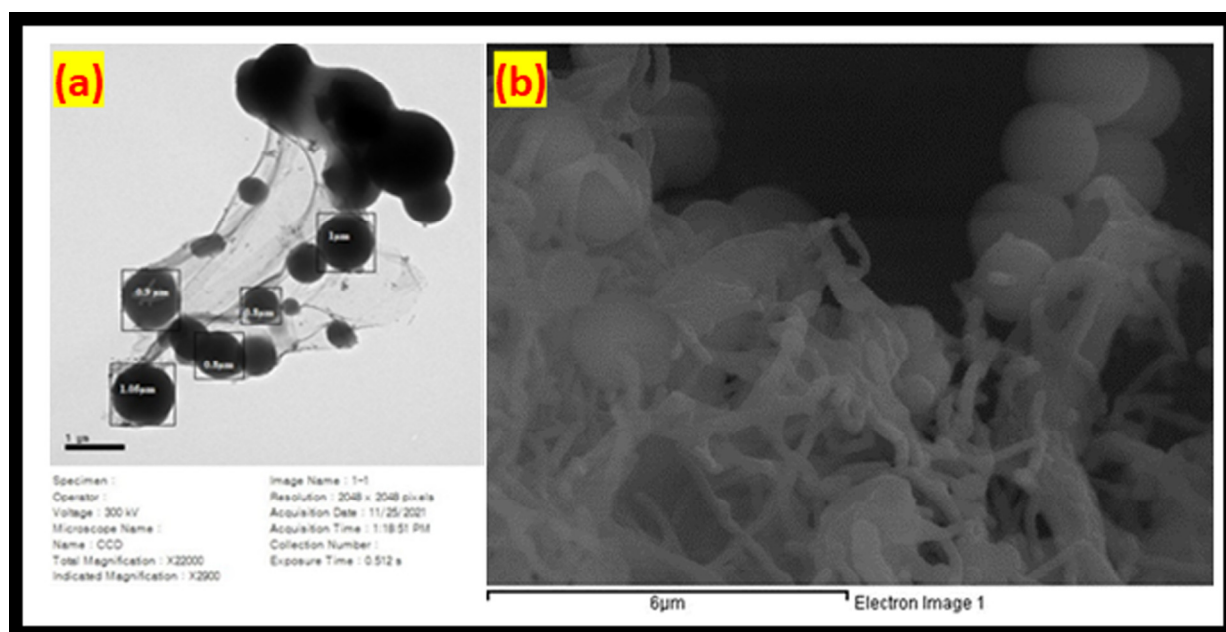

**Figure S4. a:** The TEM image shows the average size of CMP-4, **b:** SEM image of CMP-CNT

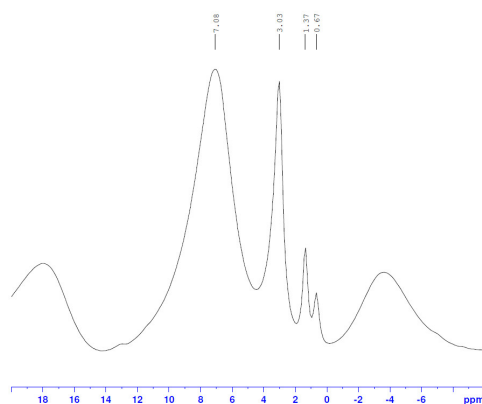

**Figure S5.** Solid state  $^1\text{H}$  NMR spectrum of poly(arylene-ethynylene), a chemical shift in ppm.

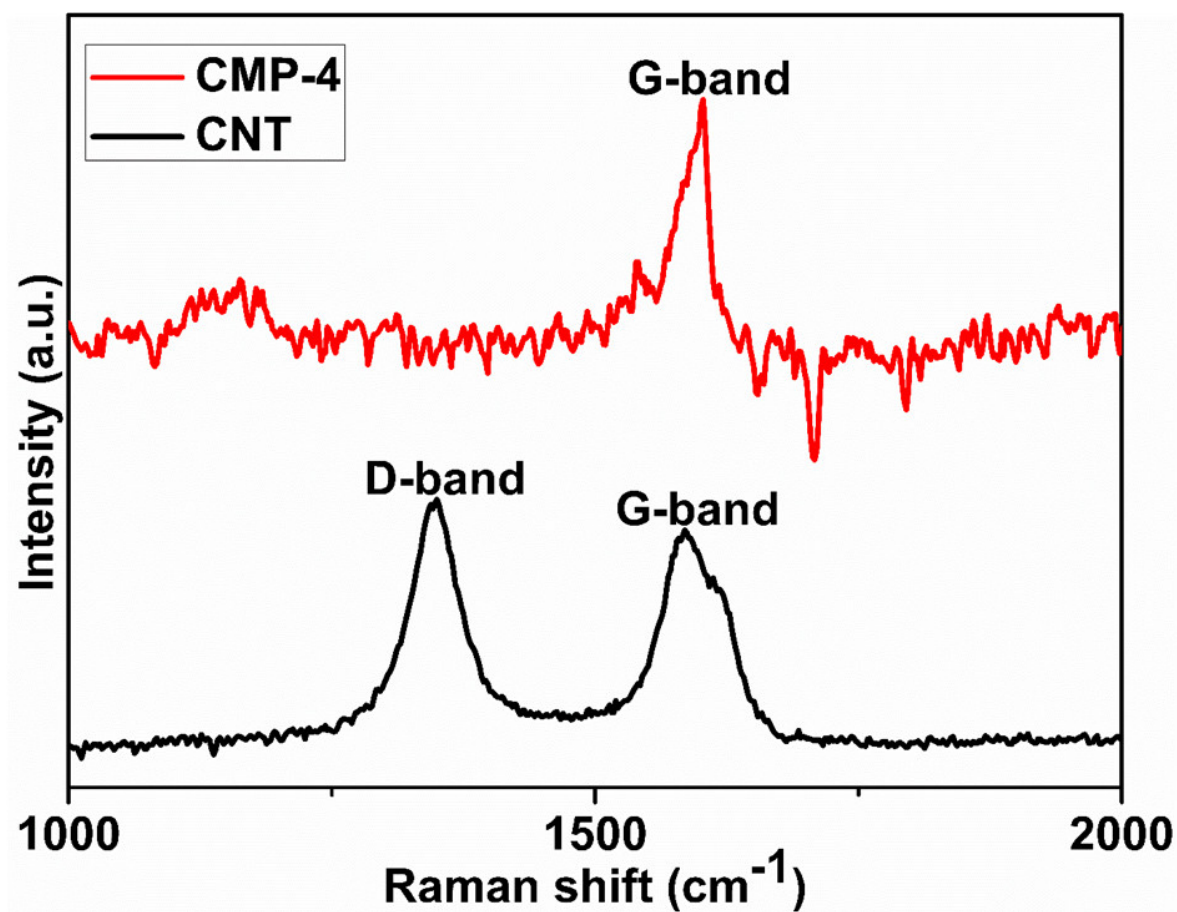

**Figure S6.** Raman plot for CMP-4 and CNT.

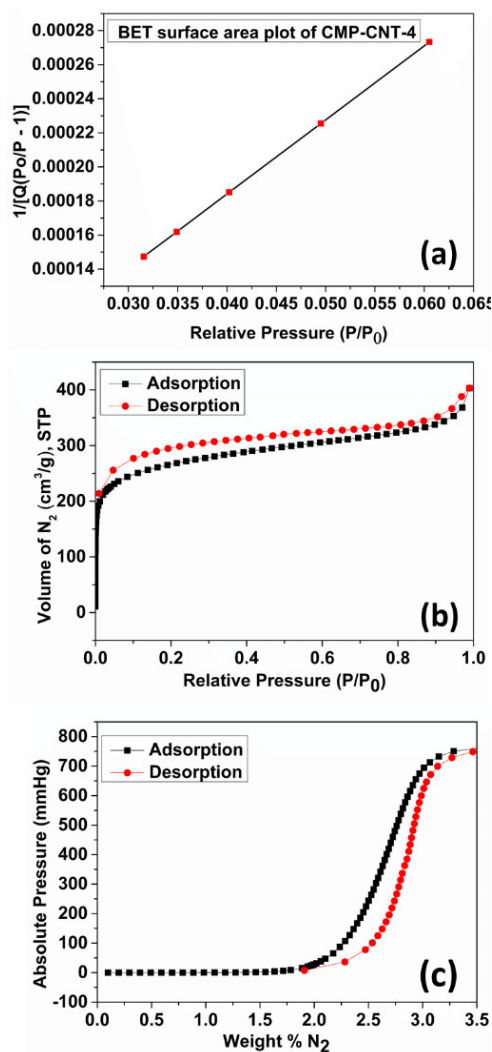

**Figure S7.** (a) BET surface area plot of CMP-CNT-4, (b) Isotherm adsorption-desorption plot for CMP-CNT-4, (c) Isotherm pressure composition plot for CMP-CNT-4.

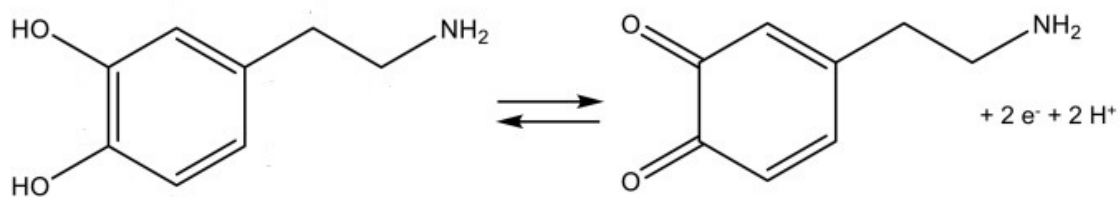

**Figure S8.** Electrochemical redox reaction in DA.

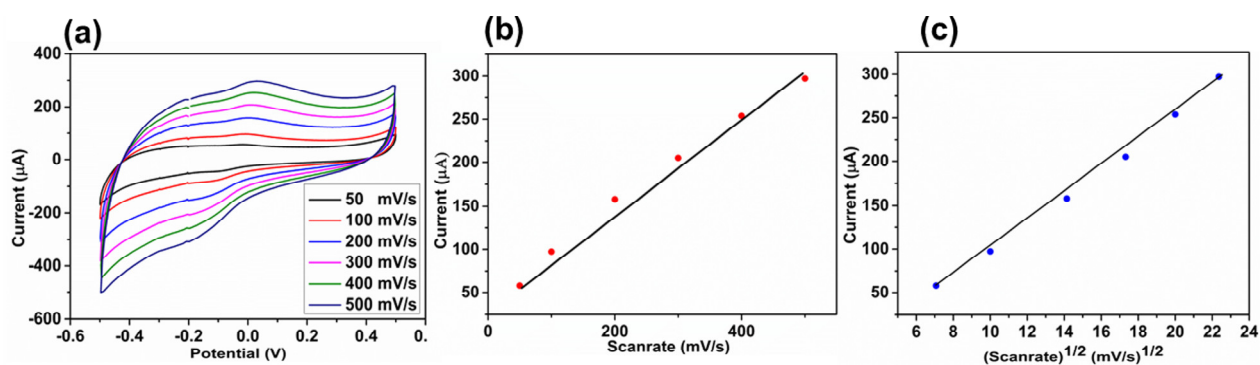

**Figure S9.** **a)** Scan rate (4 μM) from 50 – 500 mV/s, **b)** current vs scan rate, **c)** current vs (scan rate)<sup>1/2</sup>.

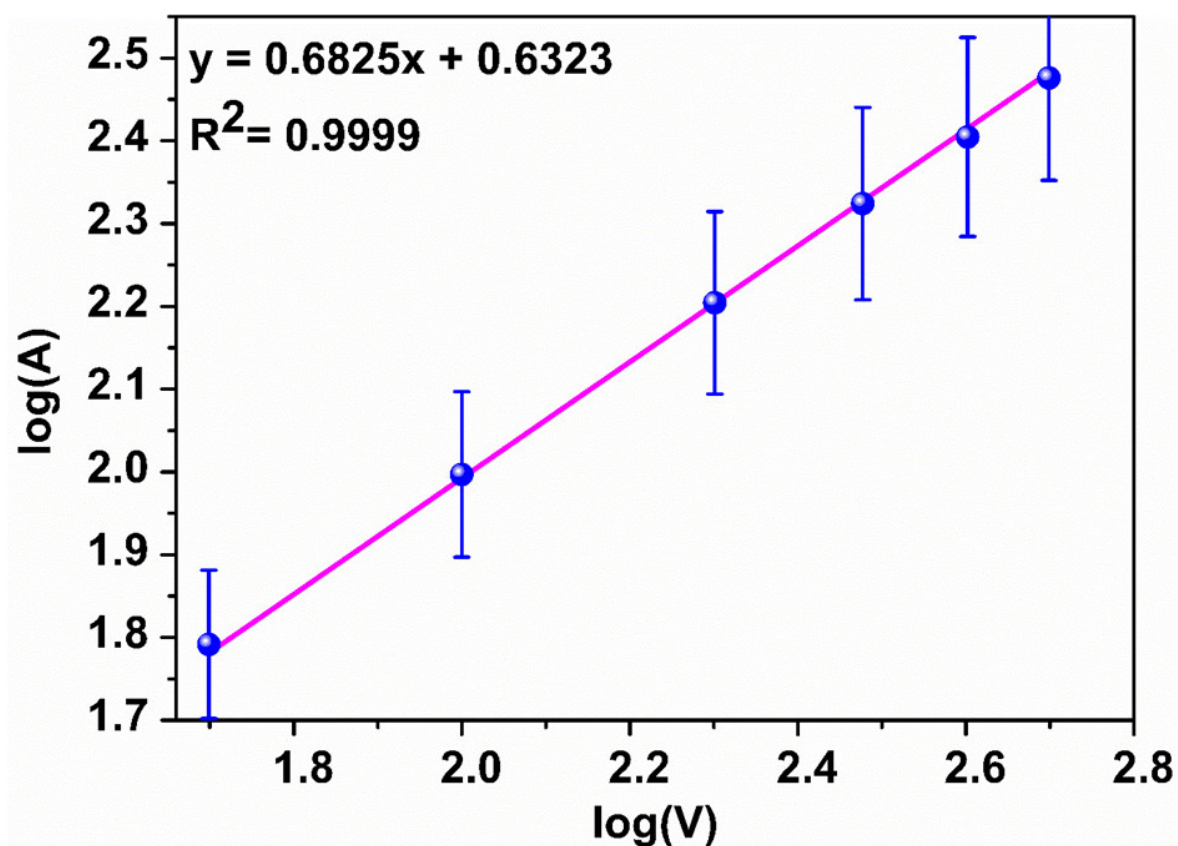

Figure S10.  $\log(V)$  Vs  $\log(A)$  plot 4  $\mu$ M DA in PBS (7.4 pH).

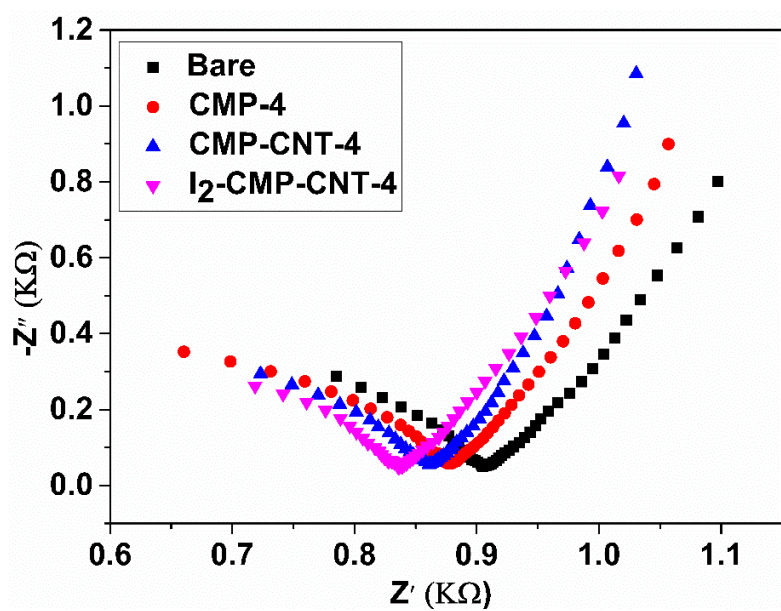

**Figure S11.** Nyquist plot for Bare GCE, CMP-4 modified GCE, CMP-CNT-4 modified GCE and  $I_2$ -CMP-CNT-4 modified GCE.

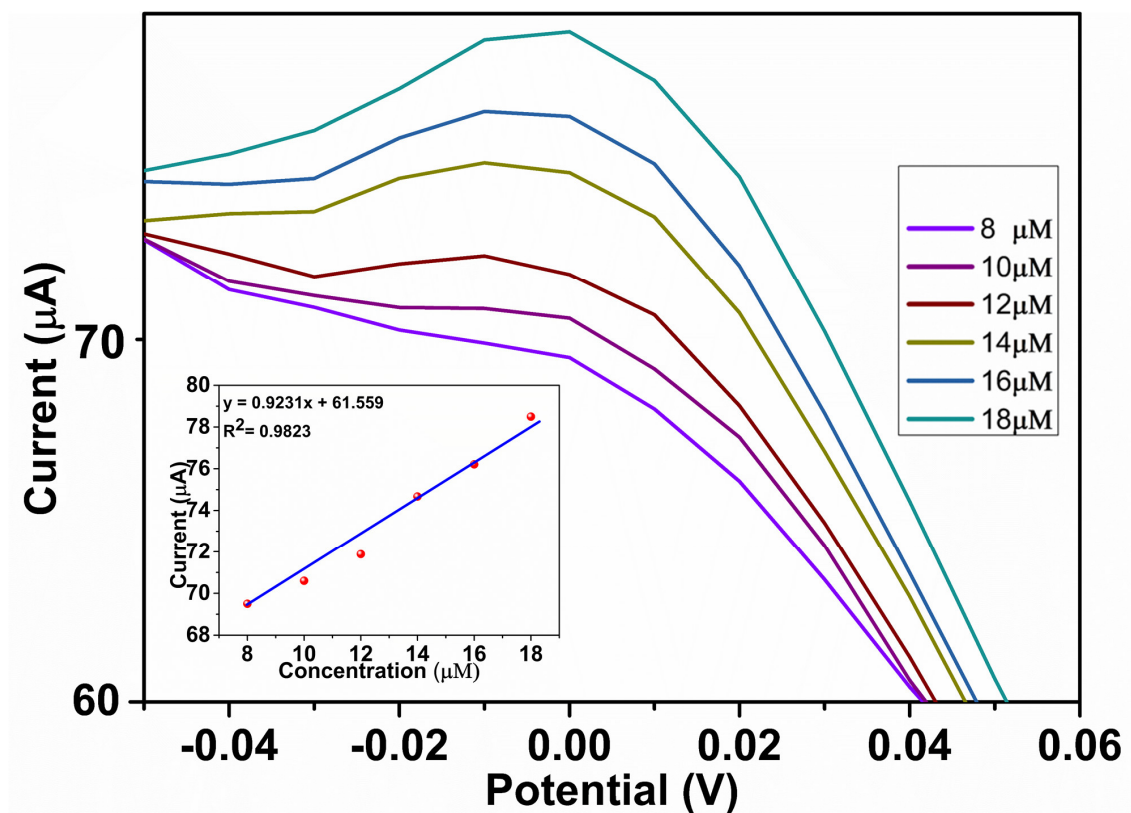

Figure S12. DPV plot for DA in FBS and linear regression equation from 8- 18  $\mu\text{M}$  DA.

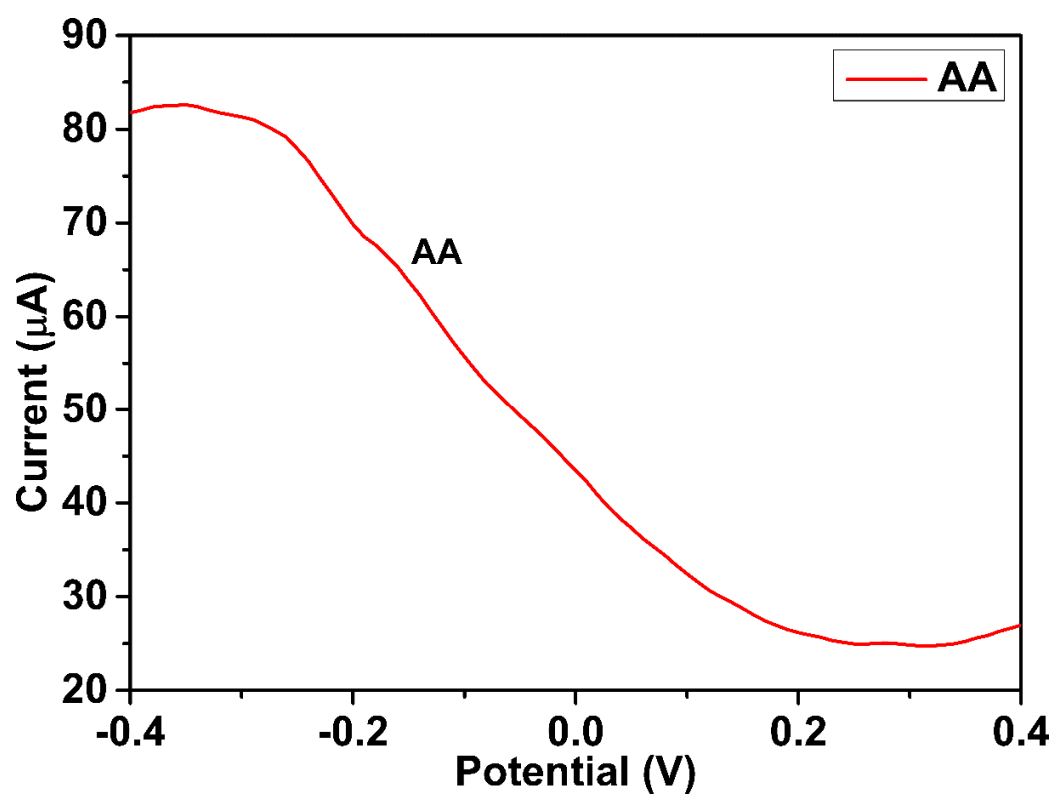

Figure S13. DPV plot of 1 μM AA in PBS (7.4 pH).

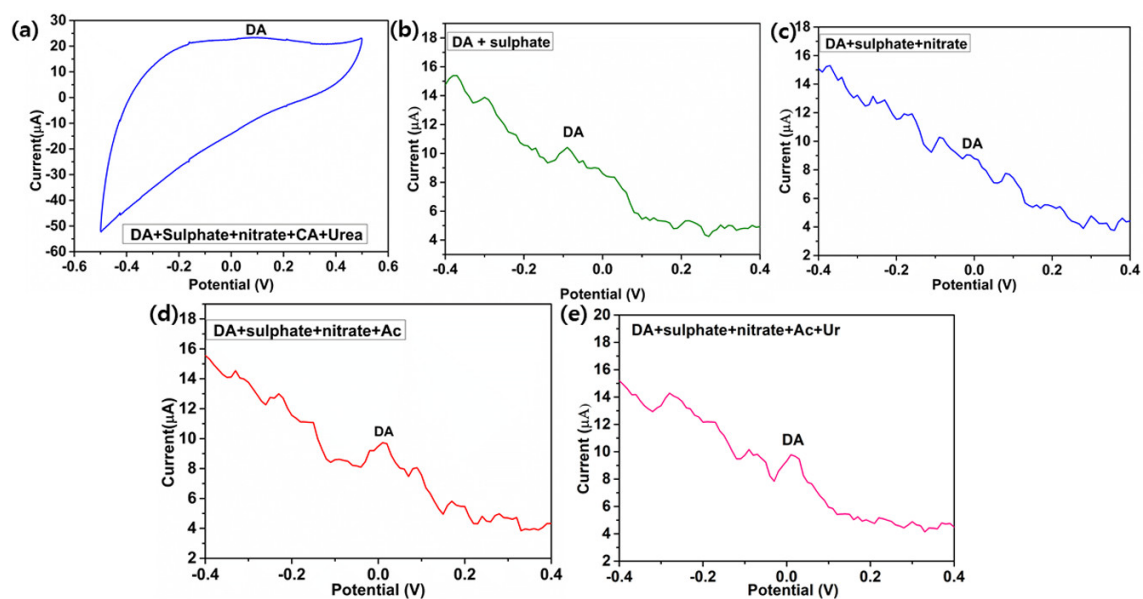

**Figure S14.** (a) CV plot for the interference of anions, (b-e) DPV plot for the interference of anions.

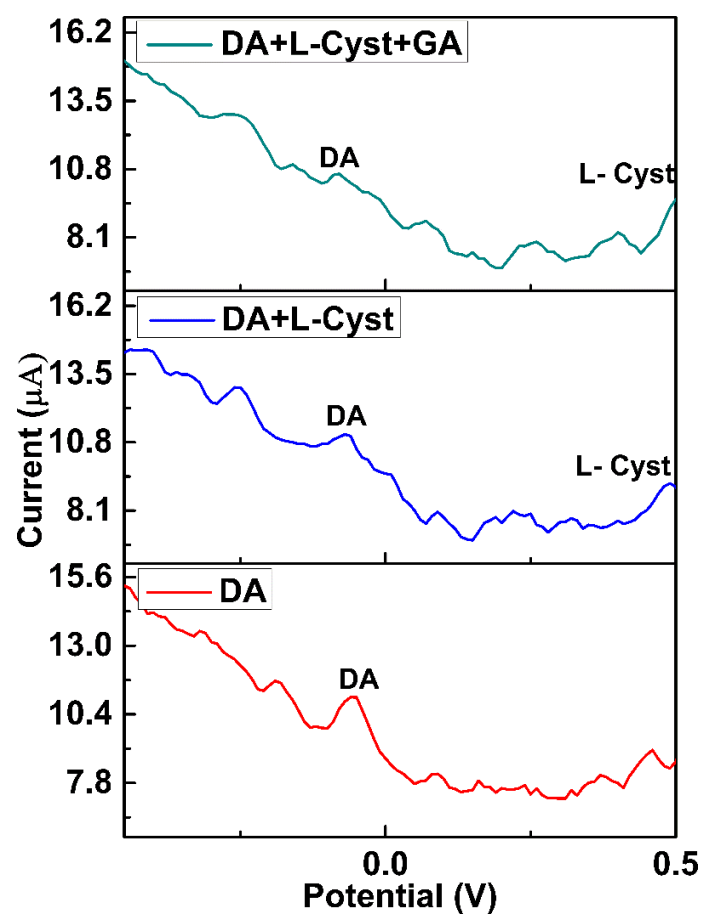

**Figure S15.** Interference DPV plot of DA, L-Cyst & GA.

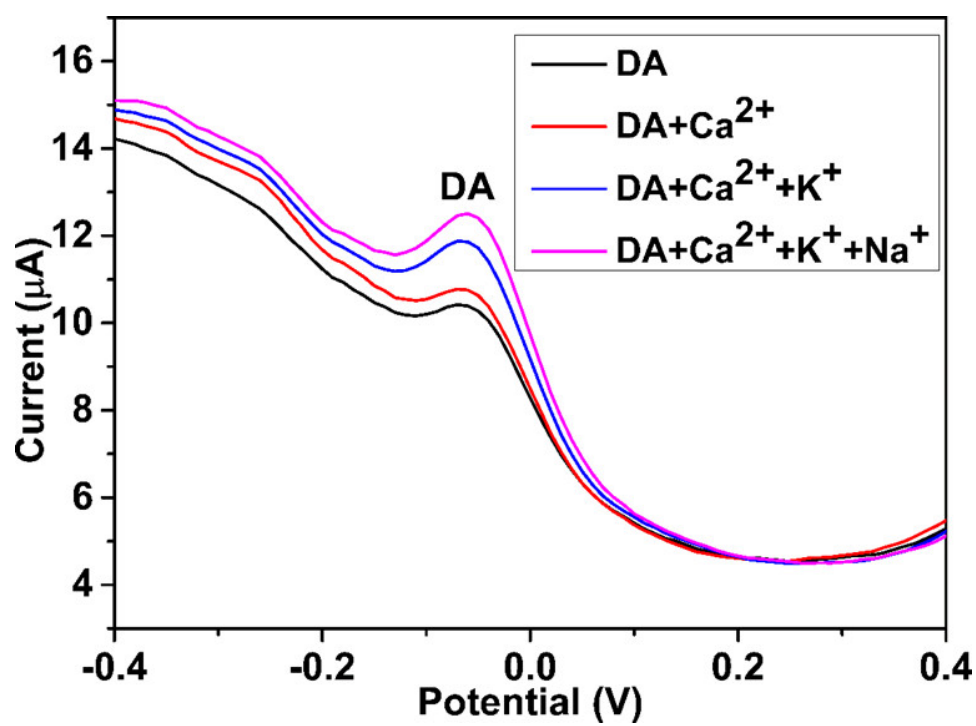

**Figure S16.** Interference DPV plot of DA in  $\text{Ca}^{2+}$ ,  $\text{K}^{+}$  &  $\text{Na}^{+}$ .

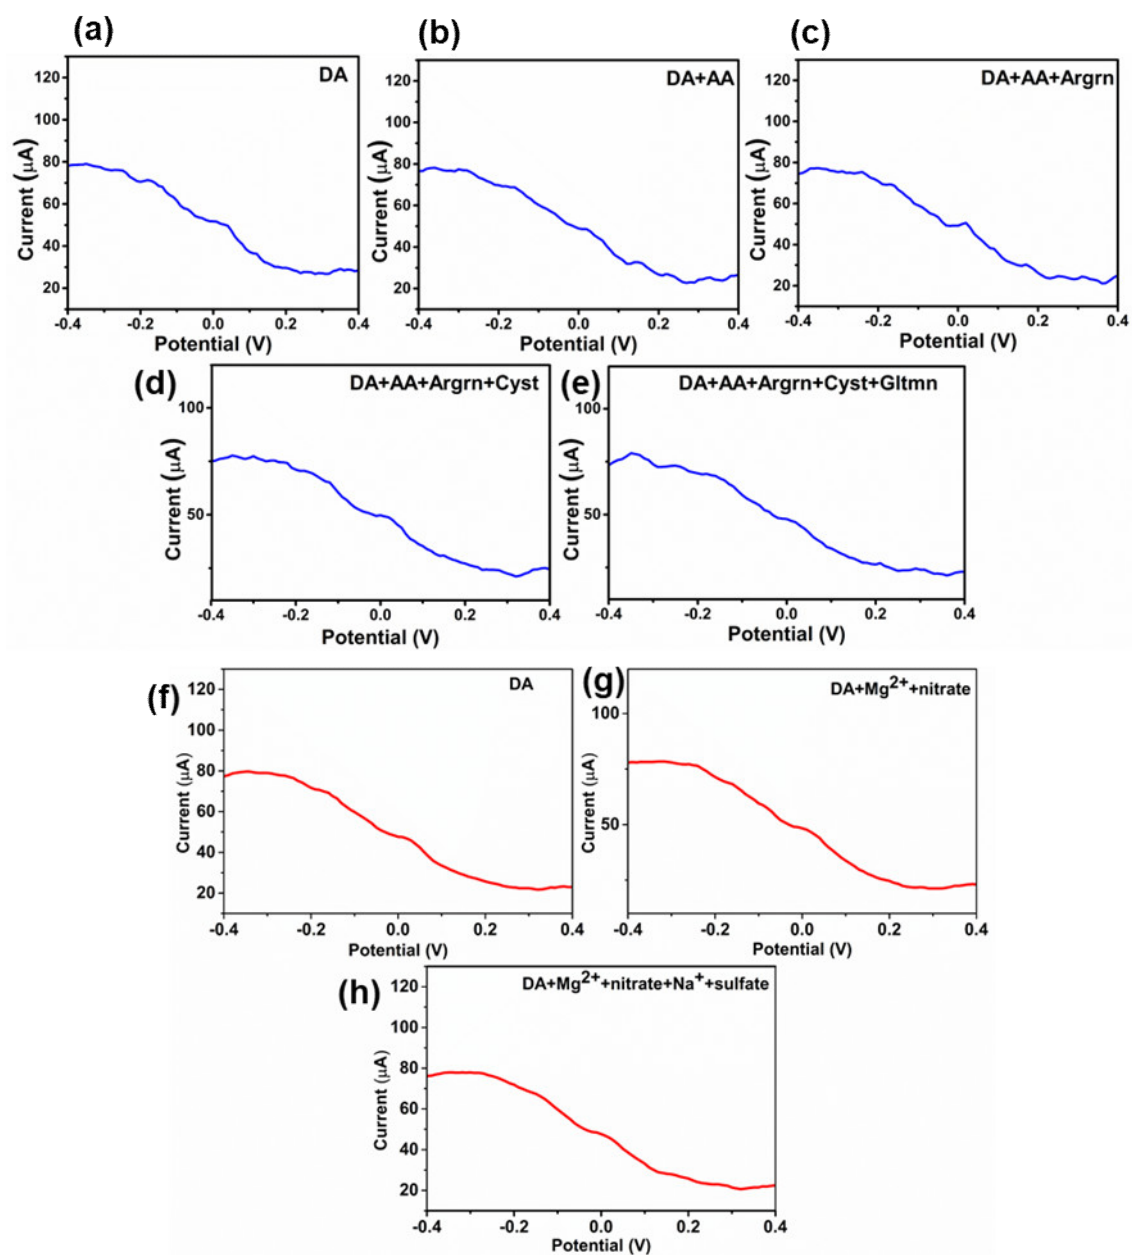

**Figure S17.** Interference plot in FBS medium for 6 μM DA in presence of AA, amino acids, cations, and anions.

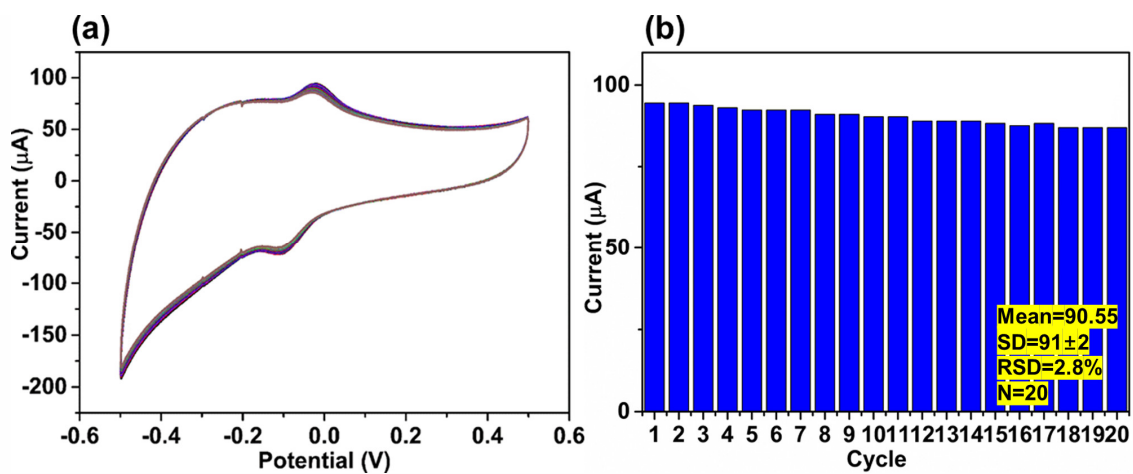

**Figure S18.** **a)** Current VS. potential CV plot of 5 μM DA (7.4 pH) in 20 cycles for stability studies, **b)** Current Vs. cycle plot of I<sub>2</sub>-CMP-CNT-4 modified GCE in 20 cycles.

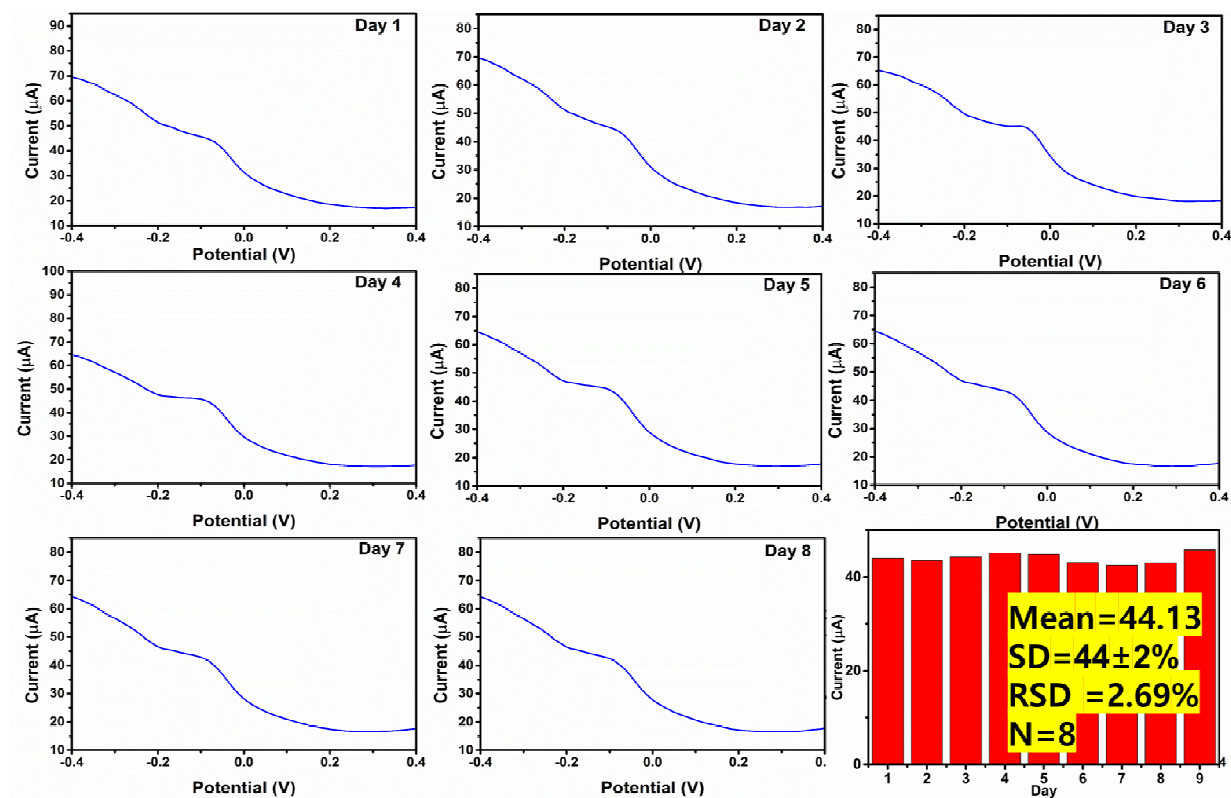

**Figure S19.** Peak reproducibility DPV plot of 5  $\mu$ M DA (7.4 pH) in 8 days, and Current Vs. day plot and RSD value.

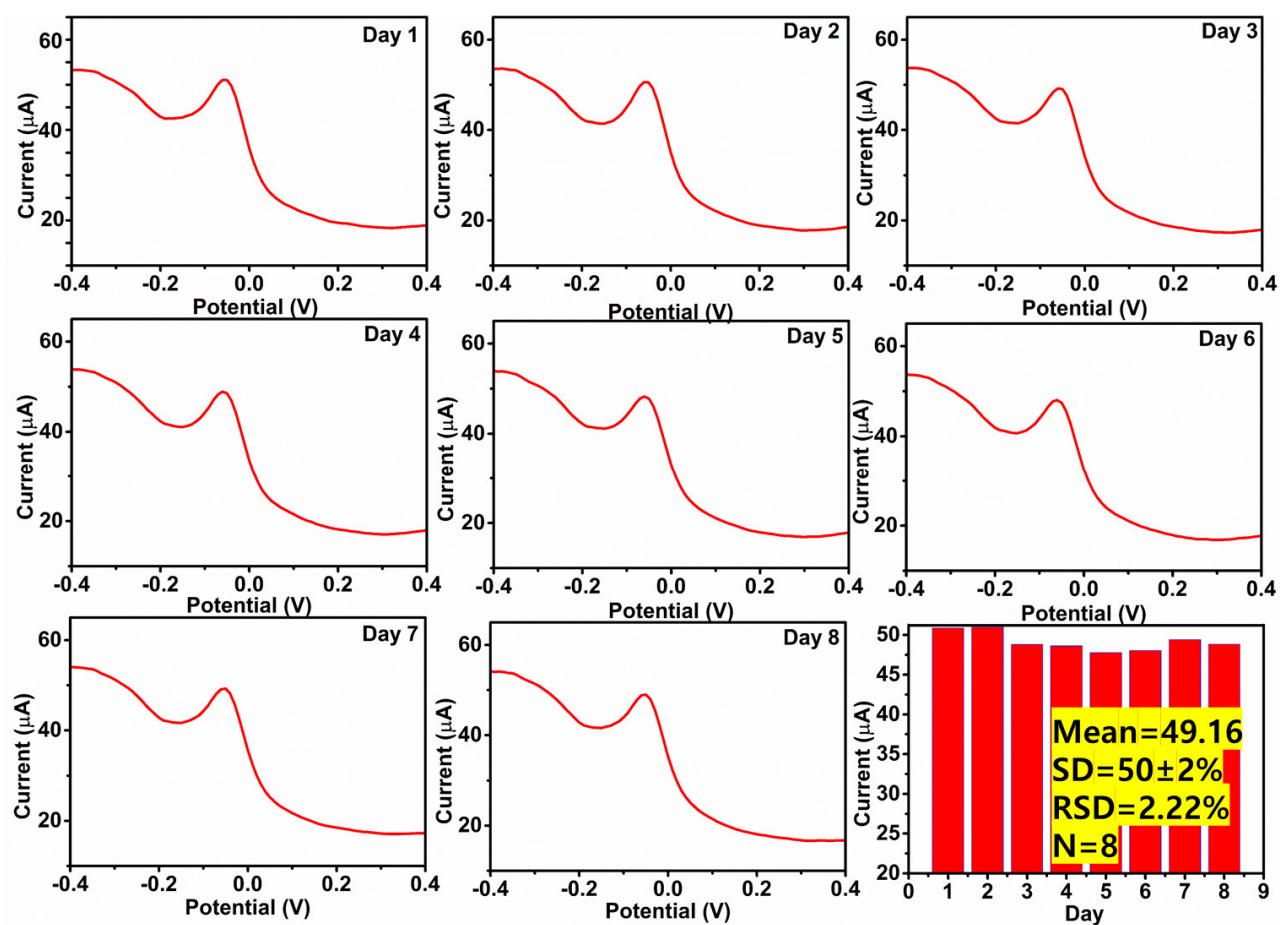

**Figure S20.** Peak reproducibility DPV plot of 6  $\mu\text{M}$  DA (7.4 pH) in 8 days, and current Vs. day plot and RSD value.

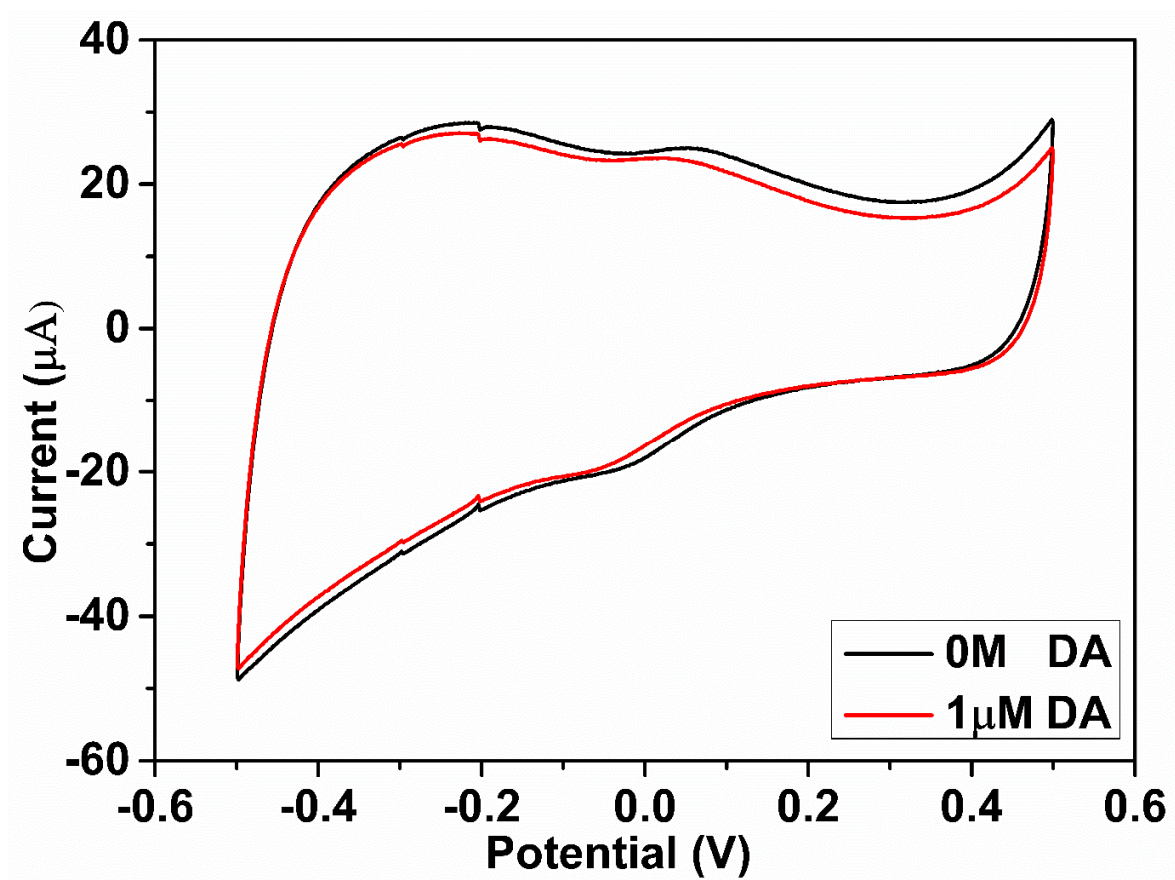

**Figure S21.** CV plot for the electrochemical behavior of CNT-modified GCE towards DA.

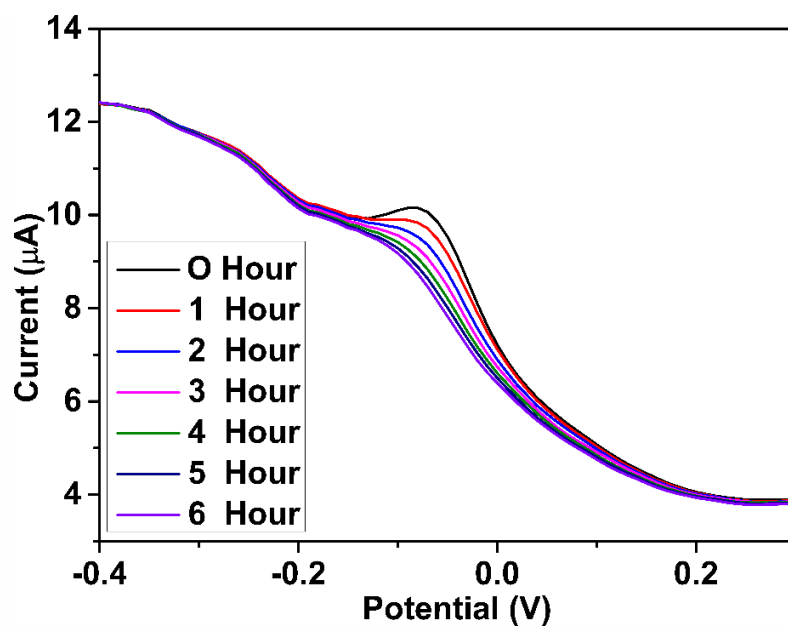

**Figure S22.** Stability study of I<sub>2</sub>-CMP-CNT-4 (1  $\mu\text{M}$  DA) at various time duration in PBS (7.4 pH).

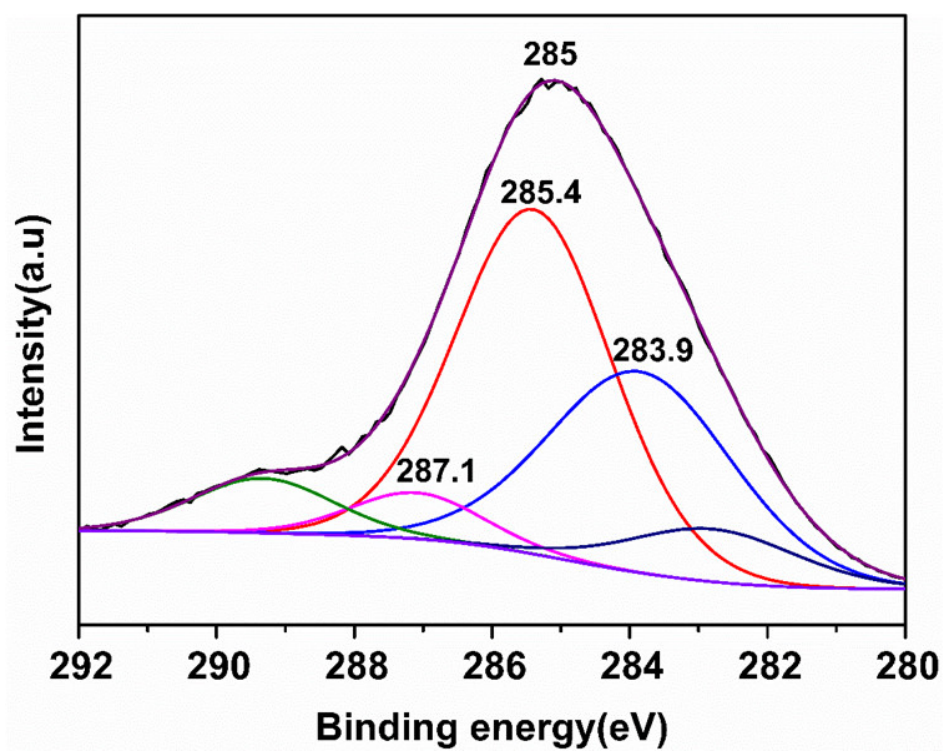

**Figure S23.** C(1s) deconvolution spectra of CMP-CNT-4.
